# Supplementary material
Source: PubMed Central journal article supplement (PMC3686321)
Supplement: NIHMS479128-supplement-01.pdf [file NIHMS479128-supplement-01.pdf]

## Supplemental Electronic-Only Materials

## Appendix A

**EFA in ESEM**

The EFA in ESEM can be written with two general equations: one for the measurement model and one for the latent variable model (Bollen, 1989). The measurement model can be written as:

$$\mathbf{Y}_{p \times 1} = \mathbf{\Lambda}_{p \times 1} + \boldsymbol{\eta}_{p \times m} \boldsymbol{\xi}_{m \times 1} + \boldsymbol{\varepsilon}_{p \times 1}, \text{ where} \quad (1)$$

$p$  is the number of continuous observed dependent variables

$m$  is the number of continuous latent variables

$q$  is the number of observed independent variables

and

$\mathbf{Y}$  is a vector of continuous observed dependent variables

$\mathbf{v}$  is a vector of intercepts or means

$\mathbf{\Lambda}$  is a matrix of pattern coefficients

$\boldsymbol{\eta}$  is a vector of continuous latent variables

$\boldsymbol{\varepsilon}$  is a vector of residuals for  $\mathbf{Y}$

$\boldsymbol{\Theta}$  is a  $p \times p$  covariance matrix for  $\boldsymbol{\varepsilon}$

The second equation can be conceptualized as the latent variable model:

$$\boldsymbol{\eta}_{m \times 1} = \boldsymbol{\alpha}_{m \times 1} + \boldsymbol{\zeta}_{m \times 1}, \text{ where} \quad (2)$$

$\boldsymbol{\eta}$  is a vector of continuous latent variables

$\boldsymbol{\alpha}$  is a vector of intercepts or means

$\boldsymbol{\zeta}$  is a vector of residuals for  $\boldsymbol{\eta}$

$\boldsymbol{\Psi}$  is a  $m \times m$  covariance matrix for  $\boldsymbol{\zeta}$

### Appendix B\_1

**Rotation.** Direct analytic rotation of the pattern matrix is based on several decades of research within the EFA framework (e.g., Jennrich, 2007; Jennrich & Sampson 1966) as detailed in Browne (2001). Rotation of the pattern matrix is accomplished via post-multiplication of the pattern matrix by the inverse of an optimal transformation matrix:

$$\Lambda_{pxr}^* = \Lambda_{pxr} (\mathbf{H}_{rxr}^*)^{-1}. \quad (3)$$

An optimal transformation matrix,  $\mathbf{H}^*$ , is determined by minimizing a continuous complexity function of the elements in the pattern matrix,  $f(\Lambda)$ . A mechanical rotation criterion can be thought of as being easy to implement but providing little to no opportunity to incorporate a priori measurement theory into the  $f(\Lambda)$ . Various rotation techniques define  $f(\Lambda)$  differently but each was typically designed to provide the simplest solution. In practice, a simple structure is often interpreted as having only one non-zero pattern coefficient per row (variable complexity,  $vc = 1$ ); though this a more restrictive approach than advocated by Thurstone (1947).

Geomin rotation (Yates, 1987) minimizes row (e.g., variable) complexity in a way that is more consistent with Thurstone's (1947) conceptualization of simple structure as compared to the more restrictive perfect simple structure. Accordingly, geomin has performed relatively well when  $vc > 1$  both in empirical examples (e.g., McDonald, 2005) and in a simulation study when compared to other mechanical rotation criteria (Sass & Schmitt, 2010). Currently geomin is the default rotation criterion in *Mplus* and, therefore, may be used frequently in practice. The  $f(\Lambda)$  for geomin implemented in *Mplus* is:

$$\sum_{i=1}^p \left( \prod_{j=1}^r (\lambda_{ij}^2 + \varepsilon) \right)^{1/r}, \text{ where} \quad (4)$$

$\varepsilon$  is a small positive constant added by Browne (2001) to reduce the problem of indeterminacy. In Asparouhov and Muthén (2009), geomin performed well when  $vc$  was moderate ( $vc \leq 2$ ),  $m$  was small ( $m = 2$ ), and the factors were moderately correlated. Geomin, however, "...fails for more complicated loading matrix structures involving three or more factors and variables with complexity 3 and more;...For more complicated examples the Target rotation criterion will lead to better results" (Asparouhov & Muthén, p. 407).

Target rotation has been developed over several decades and can be thought of as "a non-mechanical exploratory process, guided by human judgment" (Browne, 2001, p.125). Current versions of target rotation are direct and can be based on only a partially specified target matrix,  $\mathbf{B}_{pxr}$ . The  $f(\Lambda)$  for target rotation can be written as:

$$\sum_{i=1}^p \sum_{j=1}^r a_{ij} (\lambda_{ij} - b_{ij})^2, \text{ where} \quad (5)$$

$a_{ij} = 1$  if  $\lambda_{ij}$  is a target and 0 if  $\lambda_{ij}$  is not a target, and  
 $b_{ij}$  = the targeted value.

Note that the user must provide  $a_{ij}$  and  $b_{ij}$ , and therefore, helps to define  $f(\Lambda)$  for target rotation.

Thus, EFA with target rotation can be conceptualized as "situated between CFA and EFA"

(Asparouhov & Muthén, p. 399, 2009). It is important to note that a solution will be mathematically equivalent under either target or geomin rotation. Simulation research suggests, however, that in some cases the factors may be defined more consistent with a well-developed a priori theory under target rotation as compared to geomin rotation (Myers, Jin, & Ahn, 2012).

**Rotation identification.** Some known conditions for rotation identification in factor analysis exist (e.g., Algina, 1980; Hayashi & Marcoulides, 2006). Under oblique rotation  $\mathbf{H}^*$  is a non-symmetric square matrix that results in  $m^2$  indeterminacies (Asparouhov & Muthén, 2009).

Imposing  $m^2$  constraints on  $\Lambda$  and  $\Psi$  is a necessary condition for rotation identification. Setting

the scale for each latent variable to unity provides  $m$  constraints. A set of sufficient conditions for imposing the remaining  $m(m - 1)$  constraints include: (a) each column of  $\Lambda$  has  $m - 1$  elements specified as zeros, and (b) each submatrix  $\Lambda_s$ , where  $s = 1, \dots, m$ , of  $\Lambda$  composed of the rows of  $\Lambda$  that have fixed zeros in the  $s$ th column must have rank  $m - 1$ . Allow the rank of a matrix to be defined as the maximum number of independent rows or columns in that matrix.

*An example.* Target rotation can meet condition (a) and condition (b) by strategic specification of the target matrix ( $\mathbf{B}_{p \times m}$ ). Note that the dimensions of  $\mathbf{B}_{p \times m}$  match the dimensions of  $\Lambda_{p \times m}$ . Allow the targeted elements within  $\mathbf{B}$  to be those pattern coefficients that were expected to be 0 (i.e., an item was expected to have a trivial loading on a particular factor) and the non-targeted elements to be denoted by a 1. The athlete-level measurement model for the APCCS II-HST was selected for demonstration because it appears to be better understood than the athlete-level measurement model for the CCS (see Figure 1s below). Note that condition (a) was met in that each column had four zeros. Figure 2s displays how condition (b) was met. The logic embedded in this worked example can easily be extended to other applications.

*Figure 1s.* A possible target matrix for the APCCS II-HST

| Item | GS | PC | M | T | CB |
|------|----|----|---|---|----|
| GS1  | 1  | 1  | 1 | 1 | 1  |
| GS2  | 1  | 0  | 0 | 0 | 0  |
| GS3  | 1  | 1  | 1 | 1 | 1  |
| GS4  | 1  | 1  | 1 | 1 | 1  |
| PC2  | 1  | 1  | 1 | 1 | 1  |
| PC3  | 0  | 1  | 0 | 0 | 0  |
| M1   | 1  | 1  | 1 | 1 | 1  |
| M2   | 1  | 1  | 1 | 1 | 1  |
| M3   | 1  | 1  | 1 | 1 | 1  |
| M4   | 0  | 0  | 1 | 0 | 0  |
| T1   | 0  | 0  | 0 | 1 | 0  |
| T2   | 1  | 1  | 1 | 1 | 1  |
| T3   | 1  | 1  | 1 | 1 | 1  |
| T4   | 1  | 1  | 1 | 1 | 1  |
| CB1  | 1  | 1  | 1 | 1 | 1  |
| CB2  | 1  | 1  | 1 | 1 | 1  |
| CB3  | 0  | 0  | 0 | 0 | 1  |

Figure 2s. Rank for each submatrix within the specified target matrix

$$\begin{aligned}
 \mathbf{B}_1 &= \begin{bmatrix} \beta_{62} & \beta_{63} & \beta_{64} & \beta_{65} \\ \beta_{10,2} & \beta_{10,3} & \beta_{10,4} & \beta_{10,5} \\ \beta_{11,2} & \beta_{11,3} & \beta_{11,4} & \beta_{11,5} \\ \beta_{17,2} & \beta_{17,3} & \beta_{17,4} & \beta_{17,5} \end{bmatrix} = \begin{bmatrix} 1 & 0 & 0 & 0 \\ 0 & 1 & 0 & 0 \\ 0 & 0 & 1 & 0 \\ 0 & 0 & 0 & 1 \end{bmatrix}, \text{rank}(\mathbf{B}_1) = 4 \\
 \mathbf{B}_2 &= \begin{bmatrix} \beta_{21} & \beta_{23} & \beta_{24} & \beta_{25} \\ \beta_{10,1} & \beta_{10,3} & \beta_{10,4} & \beta_{10,5} \\ \beta_{11,1} & \beta_{11,3} & \beta_{11,4} & \beta_{11,5} \\ \beta_{17,1} & \beta_{17,3} & \beta_{17,4} & \beta_{17,5} \end{bmatrix} = \begin{bmatrix} 1 & 0 & 0 & 0 \\ 0 & 1 & 0 & 0 \\ 0 & 0 & 1 & 0 \\ 0 & 0 & 0 & 1 \end{bmatrix}, \text{rank}(\mathbf{B}_2) = 4 \\
 \mathbf{B}_3 &= \begin{bmatrix} \beta_{21} & \beta_{22} & \beta_{24} & \beta_{25} \\ \beta_{6,1} & \beta_{62} & \beta_{64} & \beta_{65} \\ \beta_{11,1} & \beta_{11,2} & \beta_{11,4} & \beta_{11,5} \\ \beta_{17,1} & \beta_{17,2} & \beta_{17,4} & \beta_{17,5} \end{bmatrix} = \begin{bmatrix} 1 & 0 & 0 & 0 \\ 0 & 1 & 0 & 0 \\ 0 & 0 & 1 & 0 \\ 0 & 0 & 0 & 1 \end{bmatrix}, \text{rank}(\mathbf{B}_3) = 4 \\
 \mathbf{B}_4 &= \begin{bmatrix} \beta_{21} & \beta_{22} & \beta_{23} & \beta_{25} \\ \beta_{6,1} & \beta_{62} & \beta_{63} & \beta_{65} \\ \beta_{10,1} & \beta_{10,2} & \beta_{10,3} & \beta_{10,5} \\ \beta_{17,1} & \beta_{17,2} & \beta_{17,3} & \beta_{17,5} \end{bmatrix} = \begin{bmatrix} 1 & 0 & 0 & 0 \\ 0 & 1 & 0 & 0 \\ 0 & 0 & 1 & 0 \\ 0 & 0 & 0 & 1 \end{bmatrix}, \text{rank}(\mathbf{B}_4) = 4 \\
 \mathbf{B}_5 &= \begin{bmatrix} \beta_{21} & \beta_{22} & \beta_{23} & \beta_{24} \\ \beta_{6,1} & \beta_{62} & \beta_{63} & \beta_{64} \\ \beta_{10,1} & \beta_{10,2} & \beta_{10,3} & \beta_{10,4} \\ \beta_{11,1} & \beta_{11,2} & \beta_{11,3} & \beta_{11,4} \end{bmatrix} = \begin{bmatrix} 1 & 0 & 0 & 0 \\ 0 & 1 & 0 & 0 \\ 0 & 0 & 1 & 0 \\ 0 & 0 & 0 & 1 \end{bmatrix}, \text{rank}(\mathbf{B}_5) = 4
 \end{aligned}$$

References that appear in Appendix B\_1 only

Algina, J. (1980). A note on identification in the oblique and orthogonal factor-analysis models.

*Psychometrika*, 45, 393-396. doi:10.1007/BF02293911

Hayashi, K., & Marcoulides, G. A. (2006). Examining identification issues in factor analysis.

*Structural Equation Modeling*, 13, 631-645. doi:10.1207/s15328007sem1304\_7

Jennrich, R. I. (2007). Rotation methods, algorithms, and standard errors. In R. C. MacCallum &

R. Cudek (Eds.), *Factor analysis at 100: Historical developments and future directions* (pp. 315-335). Mahwah, NJ: Lawrence Erlbaum.

Jennrich, R. I., & Sampson, P. F. (1966). Rotation to simple loadings. *Psychometrika*, 31, 313-

323. doi:10.1007/BF02289465

McDonald, R. P. (2005). Semiconfirmatory factor analysis: The example of anxiety and depression. *Structural Equation Modeling*, 12, 163-172.

doi:10.1207/s15328007sem1201\_9

Sass, D. A., & Schmitt, T. A. (2010). A comparative investigation of rotation criteria within exploratory factor analysis. *Multivariate Behavioral Research*, 45, 73-103.

doi: 10.1080/00273170903504810

## **Appendix B\_2**

### Constraints imposed in the Model 2 (baseline model)

Constraints imposed for identification purposes included partial invariance of the thresholds across groups, latent factor means fixed to zero for the reference group, the unique factor covariance matrix fixed to an identity matrix for the reference group, the first pattern coefficient within each factor fixed to 1.00 across groups, and the latent intercepts fixed to 0.00 for both groups. The subset of invariant thresholds consisted of the first threshold for all latent response variates (\*) and the first and second thresholds for each reference variate.



## Appendix C

Table 1s

*Deriving Measures from the APCCS II-HST: Key Results from Question 1 and Question 2*

| Model                              | Question 1: number of factors ( <i>m</i> ) |            |                 |            |            | Question 1: <i>m</i> - 1 versus <i>m</i> |                              |
|------------------------------------|--------------------------------------------|------------|-----------------|------------|------------|------------------------------------------|------------------------------|
|                                    | $\chi^2(df), p$                            | <i>Par</i> | <i>RMSEA</i>    | <i>CFI</i> | <i>TLI</i> | Complex                                  | $\Delta\chi^2(\Delta df), p$ |
| Model 1: <i>m</i> =1, E, G         | 470(119), <.001                            | 68         | .063(.057,.069) | .943       | .935       | Model 2                                  | 135(16), <.001               |
| Model 2: <i>m</i> =2, E, G         | 333(103), <.001                            | 84         | .055(.048,.061) | .963       | .951       | Model 3                                  | 112(15), <.001               |
| Model 3: <i>m</i> =3, E, G         | 240(88), <.001                             | 99         | .048(.041,.055) | .975       | .962       | Model 4                                  | 99(14), <.001                |
| Model 4: <i>m</i> =4, E, G         | 147(74), <.001                             | 113        | .036(.028,.045) | .988       | .978       | Model 5                                  | 62(13), <.001                |
| Model 5: <i>m</i> =5, E, G         | 88(61), .013                               | 126        | .024(.012,.035) | .996       | .990       | Model 6                                  | 31(12), .002                 |
| Model 6: <i>m</i> =6, E, G         | 59(49), .157                               | 138        | .016(.000,.030) | .998       | .996       | -----                                    | -----                        |
| Question 2: CFA versus EFA in ESEM |                                            |            |                 |            |            |                                          |                              |
| Model                              | $\chi^2(df), p$                            | <i>Par</i> | <i>RMSEA</i>    | <i>CFI</i> | <i>TLI</i> | Complex                                  | $\Delta\chi^2(\Delta df), p$ |
| Model 7: <i>m</i> =5, E, T         | 88(61), .013                               | 126        | .024(.012,.035) | .996       | .990       | -----                                    | -----                        |
| Model 8: <i>m</i> =5, C            | 154(108), .002                             | 79         | .024(.015,.032) | .993       | .991       | Model 7                                  | 75(47), .006                 |
| Model 9: <i>m</i> =5, C, g3        | 146(107), .008                             | 80         | .022(.012,.030) | .994       | .992       | Model 7                                  | 67(46), .024                 |

*Note.* *m* = number of factors, E = ESEM, C = CFA, G = geomin; T = target; PAR = number of parameters estimated; Complex = more complex model that a nested simpler model was compared to; g3 = free to cross-load on motivation.

Table 2s

*Interfactor Correlation Matrix ( $\Psi$ ) by Exploratory Structural Equation Model (ESEM) and Confirmatory Factor Analysis (CFA) from some Key Models in Table 1s*

---

| Interfactor Correlation Matrix - ESEM, Geomin (Model 5) |      |      |      |      |      |
|---------------------------------------------------------|------|------|------|------|------|
|                                                         | GS   | PC   | T    | M    | CB   |
| GS                                                      | 1.00 |      |      |      |      |
| PC                                                      | .71  | 1.00 |      |      |      |
| T                                                       | .76  | .74  | 1.00 |      |      |
| M                                                       | .68  | .58  | .68  | 1.00 |      |
| CB                                                      | .54  | .54  | .62  | .64  | 1.00 |

  

| Interfactor Correlation Matrix - ESEM, Target (Model 7) |      |      |      |      |      |
|---------------------------------------------------------|------|------|------|------|------|
|                                                         | GS   | PC   | T    | M    | CB   |
| GS                                                      | 1.00 |      |      |      |      |
| PC                                                      | .77  | 1.00 |      |      |      |
| T                                                       | .80  | .78  | 1.00 |      |      |
| M                                                       | .71  | .65  | .67  | 1.00 |      |
| CB                                                      | .73  | .68  | .73  | .69  | 1.00 |

  

| Interfactor Correlation Matrix - CFA (Model 9) |      |      |      |      |      |
|------------------------------------------------|------|------|------|------|------|
|                                                | GS   | PC   | T    | M    | CB   |
| GS                                             | 1.00 |      |      |      |      |
| PC                                             | .83  | 1.00 |      |      |      |
| T                                              | .87  | .80  | 1.00 |      |      |
| M                                              | .80  | .68  | .78  | 1.00 |      |
| CB                                             | .77  | .71  | .84  | .79  | 1.00 |

---

*Note.* GS = game strategy; PC = physical conditioning; T = technique; M = motivation; M = motivation; CB = character building.

Table 3s

*Deriving Measures from the CCS: Key Results from Question 1 and Question 2*

| Model                              | Question 1: number of factors ( <i>m</i> ) |            |            |            |                 |             |            |            | Question 1: <i>m</i> - 1 versus <i>m</i> |                              |
|------------------------------------|--------------------------------------------|------------|------------|------------|-----------------|-------------|------------|------------|------------------------------------------|------------------------------|
|                                    | $\chi^2(df), p$                            | <i>Par</i> | <i>AIC</i> | <i>BIC</i> | <i>RMSEA</i>    | <i>SRMR</i> | <i>CFI</i> | <i>TLI</i> | Complex                                  | $\Delta\chi^2(\Delta df), p$ |
| Model 1: <i>m</i> =1, E, G         | 2363(250), <.001                           | 74         | 43599      | 43922      | .120(.116,.125) | .057        | .953       | .948       | Model 2                                  | 1110(23), <.001              |
| Model 2: <i>m</i> =2, E, G         | 1343(227), <.001                           | 97         | 42364      | 42788      | .092(.087,.096) | .034        | .975       | .969       | Model 3                                  | 532(22), <.001               |
| Model 3: <i>m</i> =3, E, G         | 869(205), <.001                            | 119        | 41814      | 42334      | .074(.069,.080) | .024        | .985       | .980       | Model 4                                  | 207(21), <.001               |
| Model 4: <i>m</i> =4, E, G         | 617(184), <.001                            | 140        | 41499      | 42111      | .063(.058,.069) | .017        | .990       | .985       | Model 5                                  | 213(20), <.001               |
| Model 5: <i>m</i> =5, E, G         | 427(164), <.001                            | 160        | 41310      | 42010      | .052(.046,.058) | .012        | .994       | .990       | Model 6                                  | 102(19), <.001               |
| Model 6: <i>m</i> =6, E, G         | 320(145), <.001                            | 179        | 41206      | 41989      | .045(.039,.052) | .011        | .996       | .993       | Model 7                                  | 59(18), <.001                |
| Model 7: <i>m</i> =7, E, G         | 253(127), <.001                            | 197        | 41141      | 42002      | .041(.034,.049) | .009        | .997       | .994       | -----                                    | -----                        |
| Question 2: CFA versus EFA in ESEM |                                            |            |            |            |                 |             |            |            |                                          |                              |
| Model                              | $\chi^2(df),p$                             | <i>Par</i> | <i>AIC</i> | <i>BIC</i> | <i>RMSEA</i>    | <i>SRMR</i> | <i>CFI</i> | <i>TLI</i> | Complex                                  | $\Delta\chi^2(\Delta df), p$ |
| Model 8: <i>m</i> =4, E, T         | 617(184), <.001                            | 140        | 41499      | 42111      | .063(.058,.069) | .017        | .990       | .985       | -----                                    | -----                        |
| Model 9: <i>m</i> =4, C            | 920(243), <.001                            | 81         | 41929      | 42283      | .069(.064,.074) | .035        | .985       | .983       | Model 8                                  | 273(59), <.001               |

*Note.* *m* = number of factors, E = ESEM, C = CFA, G = geomin; T = target; PAR = number of parameters estimated; Complex = more complex model that a nested simpler model was compared to.

Table 4s

*Target-Rotated Pattern Coefficients ( $\lambda^*$ ), Standard Errors (SE), Target-Rotated Standardized Pattern Coefficients ( $\lambda^{*0}$ ), and Percentage of Variance Accounted For ( $R^2$ )*

| Item | Factor 1 = GS    |     |                     | Factor 2 = M     |     |                     | Factor 3 = T     |     |                     | Factor 4 = CB    |     |                     | $R^2$ |
|------|------------------|-----|---------------------|------------------|-----|---------------------|------------------|-----|---------------------|------------------|-----|---------------------|-------|
|      | $\lambda^*_{p1}$ | SE  | $\lambda^{*0}_{p1}$ | $\lambda^*_{p2}$ | SE  | $\lambda^{*0}_{p2}$ | $\lambda^*_{p3}$ | SE  | $\lambda^{*0}_{p3}$ | $\lambda^*_{p4}$ | SE  | $\lambda^{*0}_{p4}$ |       |
| gs2  | <b>1.46</b>      | .29 | <b>0.94</b>         | 0.14             | .07 | 0.09                | -0.23            | .14 | -0.15               | -0.04            | .07 | -0.02               | .73   |
| gs4  | <b>1.46</b>      | .29 | <b>0.90</b>         | 0.18             | .10 | 0.11                | -0.03            | .23 | -0.02               | -0.14            | .11 | -0.08               | .79   |
| gs8  | <b>1.56</b>      | .32 | <b>0.93</b>         | 0.22             | .11 | 0.13                | -0.14            | .22 | -0.08               | -0.12            | .13 | -0.07               | .79   |
| gs9  | <b>1.33</b>      | .23 | <b>0.85</b>         | 0.00             | .00 | 0.00                | 0.00             | .00 | 0.00                | 0.00             | .00 | 0.00                | .72   |
| gs11 | <b>1.10</b>      | .35 | <b>0.62</b>         | <b>0.37</b>      | .14 | <b>0.21</b>         | 0.15             | .34 | 0.09                | 0.01             | .11 | 0.01                | .73   |
| gs17 | 0.60             | .34 | 0.34                | 0.23             | .20 | 0.13                | 0.80             | .43 | 0.46                | 0.02             | .11 | 0.01                | .79   |
| gs21 | <b>0.74</b>      | .36 | <b>0.43</b>         | -0.06            | .18 | -0.04               | 0.75             | .42 | 0.44                | 0.13             | .15 | 0.07                | .76   |
| m1   | <b>0.68</b>      | .20 | <b>0.37</b>         | <b>1.49</b>      | .17 | <b>0.82</b>         | -0.27            | .22 | -0.15               | <b>-0.24</b>     | .11 | <b>-0.13</b>        | .76   |
| m3   | <b>1.23</b>      | .33 | <b>0.70</b>         | <b>0.91</b>      | .17 | <b>0.52</b>         | -0.28            | .30 | -0.16               | <b>-0.31</b>     | .12 | <b>-0.18</b>        | .68   |
| m6   | 0.00             | .00 | 0.00                | <b>1.88</b>      | .18 | <b>0.92</b>         | 0.00             | .00 | 0.00                | 0.00             | .00 | 0.00                | .85   |
| m10  | 0.72             | .38 | 0.37                | <b>1.35</b>      | .22 | <b>0.69</b>         | -0.22            | .42 | -0.11               | 0.02             | .18 | 0.01                | .77   |
| m12  | 0.52             | .31 | 0.27                | <b>0.98</b>      | .20 | <b>0.51</b>         | -0.11            | .34 | -0.06               | <b>0.36</b>      | .18 | <b>0.19</b>         | .67   |
| m15  | -0.45            | .28 | -0.22               | <b>1.65</b>      | .19 | <b>0.81</b>         | <b>0.78</b>      | .30 | <b>0.39</b>         | -0.09            | .10 | -0.05               | .87   |
| m23  | 0.22             | .27 | 0.11                | <b>1.34</b>      | .20 | <b>0.67</b>         | 0.09             | .35 | 0.05                | 0.29             | .15 | <b>0.15</b>         | .81   |
| t7   | 0.48             | .25 | 0.26                | <b>0.38</b>      | .15 | <b>0.21</b>         | <b>0.85</b>      | .32 | <b>0.47</b>         | <b>-0.37</b>     | .15 | <b>-0.20</b>        | .52   |
| t14  | -0.40            | .31 | -0.23               | <b>0.36</b>      | .18 | <b>0.20</b>         | <b>1.80</b>      | .46 | <b>1.01</b>         | <b>-0.25</b>     | .12 | <b>-0.14</b>        | .76   |
| t16  | -0.32            | .36 | -0.18               | <b>0.36</b>      | .16 | <b>0.20</b>         | <b>1.65</b>      | .49 | <b>0.95</b>         | -0.10            | .10 | -0.06               | .81   |
| t18  | 0.43             | .38 | 0.22                | 0.31             | .25 | 0.16                | 0.77             | .48 | 0.40                | 0.22             | .18 | 0.11                | .67   |
| t20  | 0.19             | .35 | 0.11                | -0.10            | .17 | -0.06               | <b>1.22</b>      | .44 | <b>0.70</b>         | 0.19             | .14 | 0.11                | .71   |
| t22  | 0.00             | .00 | 0.00                | 0.00             | .00 | 0.00                | <b>1.48</b>      | .24 | <b>0.88</b>         | 0.00             | .00 | 0.00                | .77   |
| cb5  | 0.33             | .23 | 0.17                | <b>0.72</b>      | .13 | <b>0.36</b>         | -0.36            | .26 | -0.18               | <b>1.20</b>      | .23 | <b>0.61</b>         | .78   |
| cb13 | 0.27             | .24 | 0.14                | <b>0.38</b>      | .14 | <b>0.21</b>         | -0.14            | .26 | -0.07               | <b>1.18</b>      | .21 | <b>0.63</b>         | .71   |
| cb19 | 0.00             | .00 | 0.00                | 0.00             | .00 | 0.00                | 0.00             | .00 | 0.00                | <b>1.70</b>      | .26 | <b>0.92</b>         | .84   |
| cb24 | 0.09             | .19 | 0.04                | <b>0.58</b>      | .17 | <b>0.30</b>         | -0.07            | .23 | -0.04               | <b>1.26</b>      | .20 | <b>0.64</b>         | .78   |

*Note.* Statistically significant coefficients were bolded. GS = game strategy; M = motivation; T = technique; CB = character building.

Table 5s

*Confirmatory Factor Analytic Pattern Coefficients ( $\lambda$ ), Standard Errors (SE), Standardized Pattern Coefficients ( $\lambda^0$ ), and Percentage of Variance Accounted For ( $R^2$ )*

| Item | Factor 1 = GS  |      |                  | Factor 2 = M   |      |                  | Factor 3 = T   |      |                  | Factor 4 = CB  |      |                  | $R^2$ |
|------|----------------|------|------------------|----------------|------|------------------|----------------|------|------------------|----------------|------|------------------|-------|
|      | $\lambda_{p1}$ | SE   | $\lambda_{p1}^0$ | $\lambda_{p2}$ | SE   | $\lambda_{p2}^0$ | $\lambda_{p3}$ | SE   | $\lambda_{p3}^0$ | $\lambda_{p4}$ | SE   | $\lambda_{p4}^0$ |       |
| gs2  | <b>1.28</b>    | .25  | <b>0.83</b>      | ----           | ---- | ----             | ----           | ---- | ----             | ----           | ---- | ----             | .68   |
| gs4  | <b>1.42</b>    | .24  | <b>0.87</b>      | ----           | ---- | ----             | ----           | ---- | ----             | ----           | ---- | ----             | .76   |
| gs8  | <b>1.47</b>    | .22  | <b>0.88</b>      | ----           | ---- | ----             | ----           | ---- | ----             | ----           | ---- | ----             | .77   |
| gs9  | <b>1.30</b>    | .24  | <b>0.83</b>      | ----           | ---- | ----             | ----           | ---- | ----             | ----           | ---- | ----             | .69   |
| gs11 | <b>1.51</b>    | .26  | <b>0.86</b>      | ----           | ---- | ----             | ----           | ---- | ----             | ----           | ---- | ----             | .74   |
| gs17 | <b>1.54</b>    | .25  | <b>0.89</b>      | ----           | ---- | ----             | ----           | ---- | ----             | ----           | ---- | ----             | .79   |
| gs21 | <b>1.50</b>    | .23  | <b>0.87</b>      | ----           | ---- | ----             | ----           | ---- | ----             | ----           | ---- | ----             | .76   |
| m1   | ----           | ---- | ----             | <b>1.56</b>    | .18  | <b>0.85</b>      | ----           | ---- | ----             | ----           | ---- | ----             | .73   |
| m3   | <b>0.80</b>    | .18  | <b>0.46</b>      | <b>0.68</b>    | .16  | <b>0.39</b>      | ----           | ---- | ----             | ----           | ---- | ----             | .64   |
| m6   | ----           | ---- | ----             | <b>1.82</b>    | .18  | <b>0.89</b>      | ----           | ---- | ----             | ----           | ---- | ----             | .80   |
| m10  | ----           | ---- | ----             | <b>1.72</b>    | .20  | <b>0.88</b>      | ----           | ---- | ----             | ----           | ---- | ----             | .78   |
| m12  | ----           | ---- | ----             | <b>1.56</b>    | .23  | <b>0.82</b>      | ----           | ---- | ----             | ----           | ---- | ----             | .67   |
| m15  | ----           | ---- | ----             | <b>1.83</b>    | .16  | <b>0.90</b>      | ----           | ---- | ----             | ----           | ---- | ----             | .81   |
| m23  | ----           | ---- | ----             | <b>1.82</b>    | .22  | <b>0.91</b>      | ----           | ---- | ----             | ----           | ---- | ----             | .83   |
| t7   | ----           | ---- | ----             | ----           | ---- | ----             | <b>1.31</b>    | .20  | <b>0.72</b>      | ----           | ---- | ----             | .52   |
| t14  | ----           | ---- | ----             | ----           | ---- | ----             | <b>1.51</b>    | .22  | <b>0.85</b>      | ----           | ---- | ----             | .72   |
| t16  | ----           | ---- | ----             | ----           | ---- | ----             | <b>1.54</b>    | .22  | <b>0.89</b>      | ----           | ---- | ----             | .79   |
| t18  | ----           | ---- | ----             | ----           | ---- | ----             | <b>1.57</b>    | .24  | <b>0.81</b>      | ----           | ---- | ----             | .66   |
| t20  | ----           | ---- | ----             | ----           | ---- | ----             | <b>1.45</b>    | .22  | <b>0.83</b>      | ----           | ---- | ----             | .69   |
| t22  | ----           | ---- | ----             | ----           | ---- | ----             | <b>1.48</b>    | .24  | <b>0.87</b>      | ----           | ---- | ----             | .76   |
| cb5  | ----           | ---- | ----             | ----           | ---- | ----             | ----           | ---- | ----             | <b>1.77</b>    | .25  | <b>0.90</b>      | .80   |
| cb13 | ----           | ---- | ----             | ----           | ---- | ----             | ----           | ---- | ----             | <b>1.58</b>    | .23  | <b>0.85</b>      | .71   |
| cb19 | ----           | ---- | ----             | ----           | ---- | ----             | ----           | ---- | ----             | <b>1.62</b>    | .25  | <b>0.87</b>      | .76   |
| cb24 | ----           | ---- | ----             | ----           | ---- | ----             | ----           | ---- | ----             | <b>1.73</b>    | .25  | <b>0.88</b>      | .78   |

*Note.* Statistically significant coefficients were bolded. GS = game strategy; M = motivation; T = technique; CB = character building.

Table 6s

*Interfactor Correlation Matrix ( $\Psi$ ) by Exploratory Structural Equation Model (ESEM) and Confirmatory Factor Analysis (CFA) from some Key Models in Table 3s*

---

Interfactor Correlation Matrix - ESEM, Geomin (Model 4)

|    | GS   | M    | T    | CB   |
|----|------|------|------|------|
| GS | 1.00 |      |      |      |
| M  | .57  | 1.00 |      |      |
| T  | .80  | .65  | 1.00 |      |
| CB | .68  | .61  | .67  | 1.00 |

Interfactor Correlation Matrix - ESEM, Target (Model 8)

|    | GS   | M    | T    | CB   |
|----|------|------|------|------|
| GS | 1.00 |      |      |      |
| M  | .62  | 1.00 |      |      |
| T  | .90  | .72  | 1.00 |      |
| CB | .72  | .71  | .74  | 1.00 |

Interfactor Correlation Matrix - CFA (Model 9)

|    | GS   | M    | T    | CB   |
|----|------|------|------|------|
| GS | 1.00 |      |      |      |
| M  | .81  | 1.00 |      |      |
| T  | .94  | .85  | 1.00 |      |
| CB | .79  | .86  | .80  | 1.00 |

---

*Note.* GS = game strategy; M = motivation; T = technique; CB = character building.

**Appendix D**

*Figure 3s.* Athlete-level ESEM measurement model for the CCS. Factors were named consistent with output from Table 4.

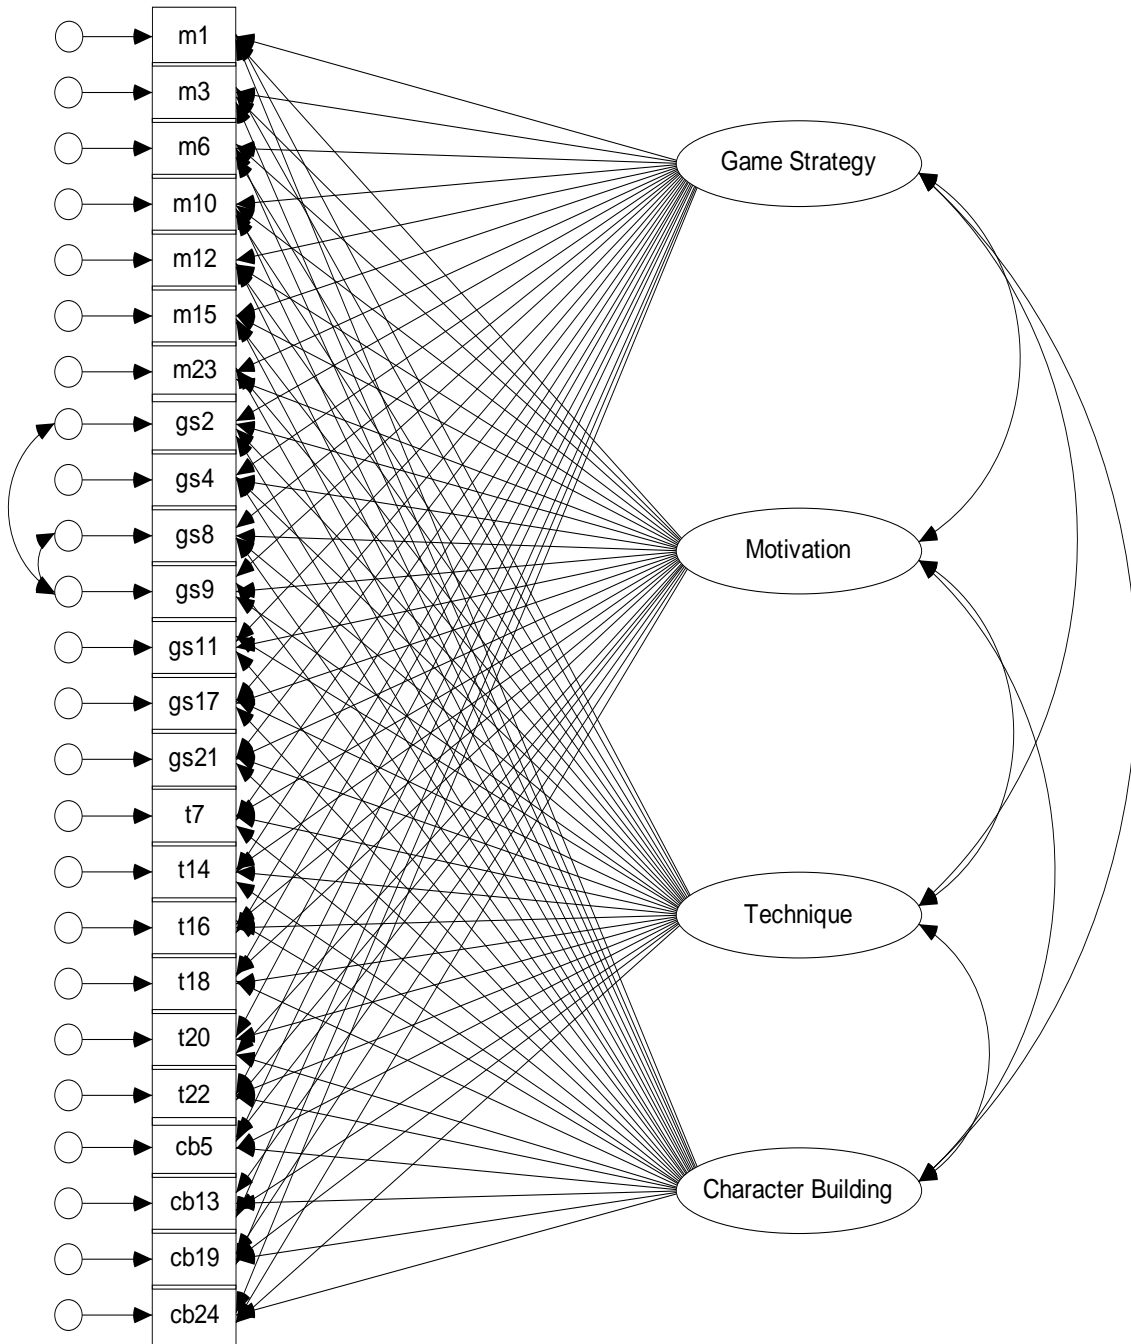

## Appendix E

**TITLE:**

APCCS II-HST, Model 7, ESEM, Target

**DATA:**

FILE = APCCS II-HST.dat;

**VARIABLE:**

NAMES = teamname g1 g2 g3 g4 p1 p2 p3 m1 m2 m3 m4 t1 t2 t3 t4 c1 c2 c3;

USEVARIABLES = g1 g2 g3 g4 p2 p3 m1 m2 m3 m4 t1 t2 t3 t4 c1 c2 c3;

CATEGORICAL = g1 g2 g3 g4 p2 p3 m1 m2 m3 m4 t1 t2 t3 t4 c1 c2 c3;

CLUSTER = teamname;

**ANALYSIS:**

TYPE = COMPLEX;

PARAMETERIZATION = THETA;

ITERATIONS = 10000;

ESTIMATOR = WLSMV;

DIFFTEST = deriv.dat;

ROTATION = TARGET;

**MODEL:**

GS BY g1-c3 p3~0 t1~0 m4~0 c3~0 (\*t);

PC BY g1-c3 g2~0 t1~0 m4~0 c3~0 (\*t);

T BY g1-c3 g2~0 p3~0 m4~0 c3~0 (\*t);

M BY g1-c3 g2~0 p3~0 t1~0 c3~0 (\*t);

CB BY g1-c3 g2~0 p3~0 t1~0 m4~0 (\*t);

**OUTPUT:**

SAMPSTAT MODINDICES(1) STANDARDIZED tech1 tech9;



TITLE:

APCCS II-HST, Model 6, ESEM, Geomin

DATA:

FILE = APCCS II-HST.dat;

VARIABLE:

NAMES = teamname g1 g2 g3 g4 p1 p2 p3 m1 m2 m3 m4 t1 t2 t3 t4 c1 c2 c3;

USEVARIABLES = g1 g2 g3 g4 p2 p3 m1 m2 m3 m4 t1 t2 t3 t4 c1 c2 c3;

CATEGORICAL = g1 g2 g3 g4 p2 p3 m1 m2 m3 m4 t1 t2 t3 t4 c1 c2 c3;

CLUSTER = teamname;

ANALYSIS:

TYPE = COMPLEX;

PARAMETERIZATION = THETA;

ITERATIONS = 10000;

ESTIMATOR = WLSMV;

DIFFTEST = deriv.dat;

ANALYSIS:

TYPE = COMPLEX;

PARAMETERIZATION = THETA;

ITERATIONS = 10000;

ESTIMATOR = WLSMV;

DIFFTEST = deriv.dat;

MODEL:

f1-f6 BY g1-c3(\*1);

OUTPUT:

SAMPSTAT MODINDICES(1) STANDARDIZED tech1;

SAVEDATA:

DIFFTEST IS deriv.dat;

TITLE:

APCCS II-HST, Model 9, CFA

DATA:

FILE = APCCS II-HST.dat;

VARIABLE:

NAMES = teamname g1 g2 g3 g4 p1 p2 p3 m1 m2 m3 m4 t1 t2 t3 t4 c1 c2 c3;

USEVARIABLES = g1 g2 g3 g4 p2 p3 m1 m2 m3 m4 t1 t2 t3 t4 c1 c2 c3;

CATEGORICAL = g1 g2 g3 g4 p2 p3 m1 m2 m3 m4 t1 t2 t3 t4 c1 c2 c3;

CLUSTER = teamname;

ANALYSIS:

TYPE = COMPLEX;

PARAMETERIZATION = THETA;

ITERATIONS = 10000;

ESTIMATOR = WLSMV;

MODEL:

GS BY g1\* g2\*1 g3\*1 g4\*1 m2\*1;

PC BY p2\*1 p3\*1;

ME BY m1\*1 m2\*1 m3\*1 m4\*1 g3\*1;

TE BY t1\*1 t2\*1 t3\*1 t4\*1;

CB BY c1\*1 c2\*1 c3\*1;

GS@1; PC@1; ME@1; TE@1; CB@1;

OUTPUT:

SAMPSTAT MODINDICES(1) STANDARDIZED tech1;

SAVEDATA:

DIFFTEST IS deriv.dat;

TITLE:

CCS, Model 4, ESEM, Geomin

DATA:

FILE = CCS.dat;

VARIABLE:

NAMES = school id

g2 g4 g8 g9 g11 g17 g21

m1 m3 m6 m10 m12 m15 m23

t7 t14 t16 t18 t20 t22

c5 c13 c19 c24;

USEVARIABLES =

g2 g4 g8 g9 g11 g17 g21

m1 m3 m6 m10 m12 m15 m23

t7 t14 t16 t18 t20 t22

c5 c13 c19 c24;

CLUSTER = school;

ANALYSIS:

TYPE = COMPLEX;

ITERATIONS = 10000;

ESTIMATOR = MLR;

MODEL:

f1-f4 BY g2-c24(\*1);

g2 WITH g9; g8 WITH g9;

OUTPUT:

SAMPSTAT MODINDICES(1) STANDARDIZED tech1;

TITLE:

CCS, Model 9, CFA

DATA:

FILE = CCS.dat;

VARIABLE:

NAMES = school id

g2 g4 g8 g9 g11 g17 g21

m1 m3 m6 m10 m12 m15 m23

t7 t14 t16 t18 t20 t22

c5 c13 c19 c24;

USEVARIABLES =

g2 g4 g8 g9 g11 g17 g21

m1 m3 m6 m10 m12 m15 m23

t7 t14 t16 t18 t20 t22

c5 c13 c19 c24;

CLUSTER = school;

ANALYSIS:

TYPE = COMPLEX;

ITERATIONS = 10000;

ESTIMATOR = MLR;

MODEL:

GS BY g2\*1 g4\*1 g8\*1 g9\*1 g11\*1 g17\*1 g21\*1 m3\*1;

ME BY m1\*1 m3\*1 m6\*1 m10\*1 m12\*1 m15\*1 m23\*1;

TE BY t7\*1 t14\*1 t16\*1 t18\*1 t20\*1 t22\*1;

CB BY c5\*1 c13\*1 c19\*1 c24\*1;

GS@1; ME@1; TE@1; CB@1;

g2 WITH g9; g8 WITH g9;

OUTPUT:

SAMPSTAT MODINDICES(1) STANDARDIZED tech1;

TITLE:

APCCS II-HST, MG, Model 1a, US

DATA:

FILE = APCCS II-HST MG.TXT;

VARIABLE:

NAMES = teamname g1 g2 g3 g4 p2 p3 m1 m2 m3 m4 t1 t2 t3 t4 c1 c2 c3 country;

USEVARIABLES = g1 g2 g3 g4 p2 p3 m1 m2 m3 m4 t1 t2 t3 t4 c1 c2 c3;

CATEGORICAL = g1 g2 g3 g4 p2 p3 m1 m2 m3 m4 t1 t2 t3 t4 c1 c2 c3;

CLUSTER = teamname;

SUBPOPULATION = country EQ 1;

ANALYSIS:

TYPE = COMPLEX;

PARAMETERIZATION = THETA;

ITERATIONS = 10000;

ESTIMATOR = WLSMV;

MODEL:

f1-f5 BY g1-c3(\*1);

OUTPUT:

SAMPSTAT MODINDICES(3.8) STANDARDIZED tech1;

TITLE:

APCCS II-HST, MG, Model 1b, UK

DATA:

FILE = APCCS II-HST MG.TXT;

VARIABLE:

NAMES = teamname g1 g2 g3 g4 p2 p3 m1 m2 m3 m4 t1 t2 t3 t4 c1 c2 c3 country;

USEVARIABLES = g1 g2 g3 g4 p2 p3 m1 m2 m3 m4 t1 t2 t3 t4 c1 c2 c3;

CATEGORICAL = g1 g2 g3 g4 p2 p3 m1 m2 m3 m4 t1 t2 t3 t4 c1 c2 c3;

CLUSTER = teamname;

SUBPOPULATION = country EQ 3;

ANALYSIS:

TYPE = COMPLEX;

PARAMETERIZATION = THETA;

ITERATIONS = 10000;

ESTIMATOR = WLSMV;

MODEL:

f1-f5 BY g1-c3(\*1);

OUTPUT:

SAMPSTAT MODINDICES(3.8) STANDARDIZED tech1;

TITLE:

APCCS II-HST, MG, Model 2, baseline

DATA:

FILE = APCCS II-HST MG.TXT;

VARIABLE:

NAMES = teamname g1 g2 g3 g4 p2 p3 m1 m2 m3 m4 t1 t2 t3 t4 c1 c2 c3 country;

USEVARIABLES = g1 g2 g3 g4 p2 p3 m1 m2 m3 m4 t1 t2 t3 t4 c1 c2 c3;

CATEGORICAL = g1 g2 g3 g4 p2 p3 m1 m2 m3 m4 t1 t2 t3 t4 c1 c2 c3;

CLUSTER = teamname;

GROUPING IS country (1=USA 3=UK);

ANALYSIS:

TYPE = COMPLEX;

PARAMETERIZATION = THETA;

ITERATIONS = 10000;

ESTIMATOR = WLSMV;

MODEL:

f1-f5 BY g1-c3(\*1);

[g1\$3 g2\$2 g2\$3 g3\$2 g3\$3 g4\$2 g4\$3  
p2\$3 p3\$2 p3\$3  
m1\$3 m2\$2 m2\$3 m3\$2 m3\$3 m4\$2 m4\$3  
t1\$3 t2\$2 t2\$3 t3\$2 t3\$3 t4\$2 t4\$3  
c1\$3 c2\$2 c2\$3 c3\$2 c3\$3];

MODEL UK:

f1-f5 BY g1-c3(\*1);

[g1\$3 g2\$2 g2\$3 g3\$2 g3\$3 g4\$2 g4\$3  
p2\$3 p3\$2 p3\$3  
m1\$3 m2\$2 m2\$3 m3\$2 m3\$3 m4\$2 m4\$3  
t1\$3 t2\$2 t2\$3 t3\$2 t3\$3 t4\$2 t4\$3  
c1\$3 c2\$2 c2\$3 c3\$2 c3\$3];

OUTPUT:

SAMPSTAT MODINDICES(3.8) STANDARDIZED TECH1;

SAVEDATA:

DIFFTEST IS deriv.dat;

TITLE:

APCCS II-HST, MG, Model 3, invariant pattern

DATA:

FILE = APCCS II-HST MG.TXT;

VARIABLE:

NAMES = teamname g1 g2 g3 g4 p2 p3 m1 m2 m3 m4 t1 t2 t3 t4 c1 c2 c3 country;

USEVARIABLES = g1 g2 g3 g4 p2 p3 m1 m2 m3 m4 t1 t2 t3 t4 c1 c2 c3;

CATEGORICAL = g1 g2 g3 g4 p2 p3 m1 m2 m3 m4 t1 t2 t3 t4 c1 c2 c3;

CLUSTER = teamname;

GROUPING IS country (1=USA 3=UK);

ANALYSIS:

TYPE = COMPLEX;

PARAMETERIZATION = THETA;

ITERATIONS = 10000;

ESTIMATOR = WLSMV;

DIFFTEST IS deriv.dat;

MODEL:

f1-f5 BY g1-c3(\*1);

[g1\$3 g2\$2 g2\$3 g3\$2 g3\$3 g4\$2 g4\$3  
p2\$3 p3\$2 p3\$3  
m1\$3 m2\$2 m2\$3 m3\$2 m3\$3 m4\$2 m4\$3  
t1\$3 t2\$2 t2\$3 t3\$2 t3\$3 t4\$2 t4\$3  
c1\$3 c2\$2 c2\$3 c3\$2 c3\$3];

MODEL UK:

[g1\$3 g2\$2 g2\$3 g3\$2 g3\$3 g4\$2 g4\$3  
p2\$3 p3\$2 p3\$3  
m1\$3 m2\$2 m2\$3 m3\$2 m3\$3 m4\$2 m4\$3  
t1\$3 t2\$2 t2\$3 t3\$2 t3\$3 t4\$2 t4\$3  
c1\$3 c2\$2 c2\$3 c3\$2 c3\$3];

OUTPUT:

SAMPSTAT MODINDICES(3.8) STANDARDIZED TECH1;



TITLE:

APCCS II-HST, MG, Model 4, invariant pattern, threshold

DATA:

FILE = APCCS II-HST MG.TXT;

VARIABLE:

NAMES = teamname g1 g2 g3 g4 p2 p3 m1 m2 m3 m4 t1 t2 t3 t4 c1 c2 c3 country;

USEVARIABLES = g1 g2 g3 g4 p2 p3 m1 m2 m3 m4 t1 t2 t3 t4 c1 c2 c3;

CATEGORICAL = g1 g2 g3 g4 p2 p3 m1 m2 m3 m4 t1 t2 t3 t4 c1 c2 c3;

CLUSTER = teamname;

GROUPING IS country (1=USA 3=UK);

ANALYSIS:

TYPE = COMPLEX;

PARAMETERIZATION = THETA;

ITERATIONS = 10000;

ESTIMATOR = WLSMV;

DIFFTEST IS deriv.dat;

MODEL:

f1-f5 BY g1-c3(\*1);

[g1\$3 g2\$2 g2\$3 g3\$2 g3\$3 g4\$2 g4\$3  
p2\$3 p3\$2 p3\$3  
m1\$3 m2\$2 m2\$3 m3\$2 m3\$3 m4\$2 m4\$3  
t1\$3 t2\$2 t2\$3 t3\$2 t3\$3 t4\$2 t4\$3  
c1\$3 c2\$2 c2\$3 c3\$2 c3\$3];

MODEL UK:

OUTPUT:

SAMPSTAT MODINDICES(3.8) STANDARDIZED TECH1;

TITLE:

APCCS II-HST, MG, Model 5, invariant pattern, threshold, residual variance

DATA:

FILE = APCCS II-HST MG.TXT;

VARIABLE:

NAMES = teamname g1 g2 g3 g4 p2 p3 m1 m2 m3 m4 t1 t2 t3 t4 c1 c2 c3 country;

USEVARIABLES = g1 g2 g3 g4 p2 p3 m1 m2 m3 m4 t1 t2 t3 t4 c1 c2 c3;

CATEGORICAL = g1 g2 g3 g4 p2 p3 m1 m2 m3 m4 t1 t2 t3 t4 c1 c2 c3;

CLUSTER = teamname;

GROUPING IS country (1=USA 3=UK);

ANALYSIS:

TYPE = COMPLEX;

PARAMETERIZATION = THETA;

ITERATIONS = 10000;

ESTIMATOR = WLSMV;

DIFFTEST IS deriv.dat;

MODEL:

f1-f5 BY g1-c3(\*1);

[g1\$3 g2\$2 g2\$3 g3\$2 g3\$3 g4\$2 g4\$3  
p2\$3 p3\$2 p3\$3  
m1\$3 m2\$2 m2\$3 m3\$2 m3\$3 m4\$2 m4\$3  
t1\$3 t2\$2 t2\$3 t3\$2 t3\$3 t4\$2 t4\$3  
c1\$3 c2\$2 c2\$3 c3\$2 c3\$3];

MODEL UK:

g1@1; g2@1; g3@1; g4@1;

p2@1; p3@1;

m1@1; m2@1; m3@1; m4@1;

t1@1; t2@1; t3@1; t4@1;

c1@1; c2@1; c3@1;

OUTPUT:

SAMPSTAT MODINDICES(3.8) STANDARDIZED TECH1;

TITLE:

APCCS II-HST, MG, Model 6, invariant pattern, threshold, residual variance, factor var

DATA:

FILE = APCCS II-HST MG.TXT;

VARIABLE:

NAMES = teamname g1 g2 g3 g4 p2 p3 m1 m2 m3 m4 t1 t2 t3 t4 c1 c2 c3 country;

USEVARIABLES = g1 g2 g3 g4 p2 p3 m1 m2 m3 m4 t1 t2 t3 t4 c1 c2 c3;

CATEGORICAL = g1 g2 g3 g4 p2 p3 m1 m2 m3 m4 t1 t2 t3 t4 c1 c2 c3;

CLUSTER = teamname;

GROUPING IS country (1=USA 3=UK);

ANALYSIS:

TYPE = COMPLEX;

PARAMETERIZATION = THETA;

ITERATIONS = 10000;

RITERATIONS = 100000;

ESTIMATOR = WLSMV;

DIFFTEST IS deriv.dat;

MODEL:

f1-f5 BY g1-c3(\*1);

[g1\$3 g2\$2 g2\$3 g3\$2 g3\$3 g4\$2 g4\$3  
p2\$3 p3\$2 p3\$3  
m1\$3 m2\$2 m2\$3 m3\$2 m3\$3 m4\$2 m4\$3  
t1\$3 t2\$2 t2\$3 t3\$2 t3\$3 t4\$2 t4\$3  
c1\$3 c2\$2 c2\$3 c3\$2 c3\$3];

f1 WITH f2 (1);

f1 WITH f3 (2);

f1 WITH f4 (3);

f1 WITH f5 (4);

f2 WITH f3 (5);

f2 WITH f4 (6);

f2 WITH f5 (7);

f3 WITH f4 (8);

f3 WITH f5 (9);

f4 WITH f5 (10);

f1-f5@1;

MODEL UK:

g1@1; g2@1; g3@1; g4@1;

p2@1; p3@1;

m1@1; m2@1; m3@1; m4@1;

t1@1; t2@1; t3@1; t4@1;

c1@1; c2@1; c3@1;

OUTPUT:

SAMPSTAT MODINDICES(3.8) STANDARDIZED TECH1;

## TITLE:

APCCS II-HST, MG, Model 7, invariant pattern, threshold, residual variance, factor var, factor means

## DATA:

FILE = APCCS II-HST MG.TXT;

## VARIABLE:

NAMES = teamname g1 g2 g3 g4 p2 p3 m1 m2 m3 m4 t1 t2 t3 t4 c1 c2 c3 country;

USEVARIABLES = g1 g2 g3 g4 p2 p3 m1 m2 m3 m4 t1 t2 t3 t4 c1 c2 c3;

CATEGORICAL = g1 g2 g3 g4 p2 p3 m1 m2 m3 m4 t1 t2 t3 t4 c1 c2 c3;

CLUSTER = teamname;

GROUPING IS country (1=USA 3=UK);

## ANALYSIS:

TYPE = COMPLEX;

PARAMETERIZATION = THETA;

ITERATIONS = 10000;

RITERATIONS = 100000;

ESTIMATOR = WLSMV;

DIFFTEST IS deriv.dat;

## MODEL:

f1-f5 BY g1-c3(\*1);

[g1\$3 g2\$2 g2\$3 g3\$2 g3\$3 g4\$2 g4\$3  
p2\$3 p3\$2 p3\$3  
m1\$3 m2\$2 m2\$3 m3\$2 m3\$3 m4\$2 m4\$3  
t1\$3 t2\$2 t2\$3 t3\$2 t3\$3 t4\$2 t4\$3  
c1\$3 c2\$2 c2\$3 c3\$2 c3\$3];

f1 WITH f2 (1);

f1 WITH f3 (2);

f1 WITH f4 (3);

f1 WITH f5 (4);

f2 WITH f3 (5);

f2 WITH f4 (6);

f2 WITH f5 (7);

f3 WITH f4 (8);

f3 WITH f5 (9);

f4 WITH f5 (10);

f1-f5@1;

[f1-f5@0];

MODEL UK:

g1@1; g2@1; g3@1; g4@1;

p2@1; p3@1;

m1@1; m2@1; m3@1; m4@1;

t1@1; t2@1; t3@1; t4@1;

c1@1; c2@1; c3@1;

OUTPUT:

SAMPSTAT MODINDICES(3.8) STANDARDIZED TECH1;
